# Supplementary material for: New insights on resource stoichiometry: assessing availability of carbon, nitrogen, and phosphorus to bacterioplankton
Source: Copernicus journal article supplement (doi:10.5194/bg-14-1527-2017), 2017-03-24
Supplement: Supplementary file 1 [file bg-14-1527-2017-supplement.pdf]

Supplement of Biogeosciences, 14, 1527–1539, 2017  
<http://www.biogeosciences.net/14/1527/2017/>  
doi:10.5194/bg-14-1527-2017-supplement  
© Author(s) 2017. CC Attribution 3.0 License.

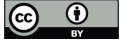

*Supplement of*

## **New insights on resource stoichiometry: assessing availability of carbon, nitrogen, and phosphorus to bacterioplankton**

**Ana R. A. Soares et al.**

*Correspondence to:* Ana R. A. Soares (anaralvessoares@gmail.com)

The copyright of individual parts of the supplement might differ from the CC-BY 3.0 licence.

**Table 1. Schematic representation of the standard growth curves design**

| Experiment Step                                     | Standard C curve                                                                                                                                                                                                                                                                                                                                                                                                                                                                                | Standard N curve                                                                                                                                                                                                                                                                                                                                                                                                        | Standard P curve                                                                                                                                                                                                                                                                                                                                                                                                                 |
|-----------------------------------------------------|-------------------------------------------------------------------------------------------------------------------------------------------------------------------------------------------------------------------------------------------------------------------------------------------------------------------------------------------------------------------------------------------------------------------------------------------------------------------------------------------------|-------------------------------------------------------------------------------------------------------------------------------------------------------------------------------------------------------------------------------------------------------------------------------------------------------------------------------------------------------------------------------------------------------------------------|----------------------------------------------------------------------------------------------------------------------------------------------------------------------------------------------------------------------------------------------------------------------------------------------------------------------------------------------------------------------------------------------------------------------------------|
| Sampling, pre-filtration, storage                   | Water sampled September 2012<br>0.7 µm filtration, storage at 1 °C                                                                                                                                                                                                                                                                                                                                                                                                                              |                                                                                                                                                                                                                                                                                                                                                                                                                         |                                                                                                                                                                                                                                                                                                                                                                                                                                  |
| Sample division                                     | Sub-volume 1                                                                                                                                                                                                                                                                                                                                                                                                                                                                                    | Sub-volume 2                                                                                                                                                                                                                                                                                                                                                                                                            | Sub-volume 3                                                                                                                                                                                                                                                                                                                                                                                                                     |
| Filtration and Inoculation, addition of "L16"       | 0.2 µm filtration<br>2 % (v/v) standard inoculum<br>5 % (v/v) "L16" bacterial growth medium                                                                                                                                                                                                                                                                                                                                                                                                     | 0.2 µm filtration<br>2 % (v/v) standard inoculum<br>5 % (v/v) "L16" bacterial growth medium                                                                                                                                                                                                                                                                                                                             | 0.2 µm filtration<br>2 % (v/v) standard inoculum<br>5 % (v/v) "L16" bacterial growth medium                                                                                                                                                                                                                                                                                                                                      |
| Induction of element limitation                     | C-limitation induced<br>+2000 µg N L <sup>-1</sup> as NH <sub>4</sub> NO <sub>3</sub><br>+200 µg P L <sup>-1</sup> as Na <sub>2</sub> HPO <sub>4</sub>                                                                                                                                                                                                                                                                                                                                          | N-limitation induced<br>+20000 µg C L <sup>-1</sup> as C <sub>6</sub> H <sub>12</sub> O <sub>6</sub><br>+200 µg P L <sup>-1</sup> as Na <sub>2</sub> HPO <sub>4</sub>                                                                                                                                                                                                                                                   | P-limitation induced<br>+20000 µg C L <sup>-1</sup> as C <sub>6</sub> H <sub>12</sub> O <sub>6</sub><br>+2000 µg N L <sup>-1</sup> as NH <sub>4</sub> NO <sub>3</sub>                                                                                                                                                                                                                                                            |
| Subsample division                                  | sub-volume 1.1, 1.2, 1.3, 1.4, 1.5                                                                                                                                                                                                                                                                                                                                                                                                                                                              | sub-volume 2.1, 2.2, 2.3, 2.4, 2.5                                                                                                                                                                                                                                                                                                                                                                                      | sub-volume 3.1, 3.2, 3.3, 3.4, 3.5                                                                                                                                                                                                                                                                                                                                                                                               |
| Bioassay "spiking" with known element concentration | +330 µg C L <sup>-1</sup> as C <sub>6</sub> H <sub>12</sub> O <sub>6</sub> (C <sub>1</sub> )<br>+660 µg C L <sup>-1</sup> as C <sub>6</sub> H <sub>12</sub> O <sub>6</sub> (C <sub>2</sub> )<br>+1000 µg C L <sup>-1</sup> as C <sub>6</sub> H <sub>12</sub> O <sub>6</sub> (C <sub>3</sub> )<br>+1330 µg C L <sup>-1</sup> as C <sub>6</sub> H <sub>12</sub> O <sub>6</sub> (C <sub>4</sub> )<br>+1500 µg C L <sup>-1</sup> as C <sub>6</sub> H <sub>12</sub> O <sub>6</sub> (C <sub>5</sub> ) | +105 µg N L <sup>-1</sup> as NH <sub>4</sub> NO <sub>3</sub> (N <sub>1</sub> )<br>+133 µg N L <sup>-1</sup> as NH <sub>4</sub> NO <sub>3</sub> (N <sub>2</sub> )<br>+ 205 µg N L <sup>-1</sup> as NH <sub>4</sub> NO <sub>3</sub> (N <sub>3</sub> )<br>+305 µg N L <sup>-1</sup> as NH <sub>4</sub> NO <sub>3</sub> (N <sub>4</sub> )<br>+405 µg N L <sup>-1</sup> as NH <sub>4</sub> NO <sub>3</sub> (N <sub>5</sub> ) | +15.5 µg P L <sup>-1</sup> as Na <sub>2</sub> HPO <sub>4</sub> (P <sub>1</sub> )<br>+18.8 µg P L <sup>-1</sup> as Na <sub>2</sub> HPO <sub>4</sub> (P <sub>2</sub> )<br>+20.5 µg P L <sup>-1</sup> as Na <sub>2</sub> HPO <sub>4</sub> (P <sub>3</sub> )<br>+30.5 µg P L <sup>-1</sup> as Na <sub>2</sub> HPO <sub>4</sub> (P <sub>4</sub> )<br>+40.5 µg P L <sup>-1</sup> as Na <sub>2</sub> HPO <sub>4</sub> (P <sub>5</sub> ) |
| Bioassay incubation                                 | 7-day incubation at 20 °C in Eppendorf tubes                                                                                                                                                                                                                                                                                                                                                                                                                                                    |                                                                                                                                                                                                                                                                                                                                                                                                                         | 7-day incubation at 20 °C in Eppendorf tubes                                                                                                                                                                                                                                                                                                                                                                                     |
| Determination and integration of leucine uptake     | Measurements of leucine incorporation at discrete time points (t1, t2, t3, t4, t7) and integration for 7 days                                                                                                                                                                                                                                                                                                                                                                                   | Measurements of leucine incorporation at discrete time points (t1, t2, t3, t4, t7) and integration for 7 days                                                                                                                                                                                                                                                                                                           | Measurements of leucine incorporation at discrete time points (t1, t2, t3, t4, t7) and integration for 7 days                                                                                                                                                                                                                                                                                                                    |
| Standard growth curves                              | 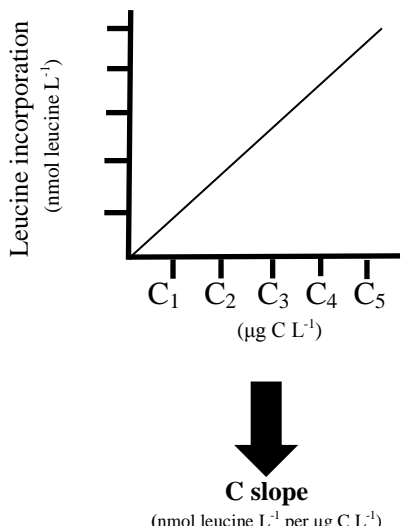 <p>Leucine incorporation (nmol leucine L<sup>-1</sup>)</p> <p>C<sub>1</sub> C<sub>2</sub> C<sub>3</sub> C<sub>4</sub> C<sub>5</sub><br/>(µg C L<sup>-1</sup>)</p> <p><b>C slope</b><br/>(nmol leucine L<sup>-1</sup> per µg C L<sup>-1</sup>)</p>                                                                                                                                                            |  <p>Leucine incorporation (nmol leucine L<sup>-1</sup>)</p> <p>N<sub>1</sub> N<sub>2</sub> N<sub>3</sub> N<sub>4</sub> N<sub>5</sub><br/>(µg N L<sup>-1</sup>)</p> <p><b>N slope</b><br/>(nmol leucine L<sup>-1</sup> per µg N L<sup>-1</sup>)</p>                                                                                  |  <p>Leucine incorporation (nmol leucine L<sup>-1</sup>)</p> <p>P<sub>1</sub> P<sub>2</sub> P<sub>3</sub> P<sub>4</sub> P<sub>5</sub><br/>(µg P L<sup>-1</sup>)</p> <p><b>P slope</b><br/>(nmol leucine L<sup>-1</sup> per µg P L<sup>-1</sup>)</p>                                                                                           |

**Table 2. Schematic representation of experimental controls design**

| Experiment step                                 | C control                                                                                                                                    | N control                                                                                                                                                | P control                                                                                                                                                |
|-------------------------------------------------|----------------------------------------------------------------------------------------------------------------------------------------------|----------------------------------------------------------------------------------------------------------------------------------------------------------|----------------------------------------------------------------------------------------------------------------------------------------------------------|
| Inoculation                                     | 2 % (v/v) standard inoculum                                                                                                                  | 2 % (v/v) standard inoculum                                                                                                                              | 2 % (v/v) standard inoculum                                                                                                                              |
| Addition of "L16"                               | 5 % (v/v) "L16" bacterial growth medium                                                                                                      | 5 % (v/v) "L16" bacterial growth medium                                                                                                                  | 5 % (v/v) "L16" bacterial growth medium                                                                                                                  |
| Induction of element limitation                 | C-limitation induced<br>+2000 $\mu\text{g N L}^{-1}$ as $\text{NH}_4\text{NO}_3$<br>+200 $\mu\text{g P L}^{-1}$ as $\text{Na}_2\text{HPO}_4$ | N-limitation induced<br>+20000 $\mu\text{g C L}^{-1}$ as $\text{C}_6\text{H}_{12}\text{O}_6$<br>+200 $\mu\text{g P L}^{-1}$ as $\text{Na}_2\text{HPO}_4$ | P-limitation induced<br>+20000 $\mu\text{g C L}^{-1}$ as $\text{C}_6\text{H}_{12}\text{O}_6$<br>+2000 $\mu\text{g N L}^{-1}$ as $\text{NH}_4\text{NO}_3$ |
| Bioassay incubation                             | 7-day incubation at 20 °C in Eppendorf tubes<br>(5 replicates)                                                                               | 7-day incubation at 20 °C in Eppendorf tubes<br>(5 replicates)                                                                                           | 7-day incubation at 20 °C in Eppendorf tubes<br>(5 replicates)                                                                                           |
| Determination and integration of leucine uptake | Measurements of leucine incorporation at discrete time points (t1, t2, t3, t4, t7) and integration for 7 days                                | Measurements of leucine incorporation at discrete time points (t1, t2, t3, t4, t7) and integration for 7 days                                            | Measurements of leucine incorporation at discrete time points (t1, t2, t3, t4, t7) and integration for 7 days                                            |

**Table 3. Schematic representation of determination of bioavailable C, N and P**

| Experiment step                                                         | Bioavailable C                                                                                                                                                                                                       | Bioavailable N                                                                                                                                                                                                       | Bioavailable P                                                                                                                                                                                                       |
|-------------------------------------------------------------------------|----------------------------------------------------------------------------------------------------------------------------------------------------------------------------------------------------------------------|----------------------------------------------------------------------------------------------------------------------------------------------------------------------------------------------------------------------|----------------------------------------------------------------------------------------------------------------------------------------------------------------------------------------------------------------------|
| Sampling, pre-filtration, storage                                       | Water sample,<br>0.7 $\mu\text{m}$ filtration<br>1 °C storage                                                                                                                                                        |                                                                                                                                                                                                                      |                                                                                                                                                                                                                      |
| Sample division                                                         | Sub-volume 1                                                                                                                                                                                                         | Sub-volume 2                                                                                                                                                                                                         | Sub-volume 3                                                                                                                                                                                                         |
| Filtration and inoculation, addition of "L16"                           | 0.2 $\mu\text{m}$ filtration<br>2 % (v/v) standard inoculum<br>5 % (v/v) "L16" bacterial growth medium                                                                                                               | 0.2 $\mu\text{m}$ filtration<br>2 % (v/v) standard inoculum<br>5 % (v/v) "L16" bacterial growth medium                                                                                                               | 0.2 $\mu\text{m}$ filtration<br>2 % (v/v) standard inoculum<br>5 % (v/v) "L16" bacterial growth medium                                                                                                               |
| Induction of element limitation                                         | C-limitation induced<br>+2000 $\mu\text{g N L}^{-1}$ as $\text{NH}_4\text{NO}_3$<br>+200 $\mu\text{g P L}^{-1}$ as $\text{Na}_2\text{HPO}_4$                                                                         | N-limitation induced<br>+20000 $\mu\text{g C L}^{-1}$ as $\text{C}_6\text{H}_{12}\text{O}_6$<br>+200 $\mu\text{g P L}^{-1}$ as $\text{Na}_2\text{HPO}_4$                                                             | P-limitation induced<br>+20000 $\mu\text{g C L}^{-1}$ as $\text{C}_6\text{H}_{12}\text{O}_6$<br>+2000 $\mu\text{g N L}^{-1}$ as $\text{NH}_4\text{NO}_3$                                                             |
| Bioassay incubation                                                     | 7-day incubation at 20 °C in Eppendorf tubes<br>(5 replicates)                                                                                                                                                       | 7-day incubation at 20 °C in Eppendorf tubes<br>(5 replicates)                                                                                                                                                       | 7-day incubation at 20 °C in Eppendorf tubes<br>(5 replicates)                                                                                                                                                       |
| Determination and integration of leucine uptake                         | Measurements of leucine incorporation at discrete time points (t1, t2, t3, t4, t7) and integration for 7 days                                                                                                        | Measurements of leucine incorporation at discrete time points (t1, t2, t3, t4, t7) and integration for 7 days                                                                                                        | Measurements of leucine incorporation at discrete time points (t1, t2, t3, t4, t7) and integration for 7 days                                                                                                        |
| Correction for blanks                                                   | Corrected leucine incorporation = average measurements of leucine incorporation (n = 5) – average leucine incorporation from experimental controls (n = 5)                                                           | Corrected leucine incorporation = average measurements of leucine incorporation (n = 5) – average leucine incorporation from experimental controls (n = 5)                                                           | Corrected leucine incorporation = average measurements of leucine incorporation (n = 5) – average leucine incorporation from experimental controls (n = 5)                                                           |
| Determination of amounts of bioavailable element taken up during 7 days | Bioavailable C taken up ( $\mu\text{g C L}^{-1}$ ) =<br>Corrected leucine incorporation<br>(nmol of leucine $\text{L}^{-1}$ )<br>$\div$<br><b>C slope</b> (nmol leucine $\text{L}^{-1}$ per $\mu\text{g C L}^{-1}$ ) | Bioavailable N taken up ( $\mu\text{g N L}^{-1}$ ) =<br>Corrected leucine incorporation<br>(nmol of leucine $\text{L}^{-1}$ )<br>$\div$<br><b>N slope</b> (nmol leucine $\text{L}^{-1}$ per $\mu\text{g N L}^{-1}$ ) | Bioavailable P taken up ( $\mu\text{g P L}^{-1}$ ) =<br>Corrected leucine incorporation<br>(nmol of leucine $\text{L}^{-1}$ )<br>$\div$<br><b>P slope</b> (nmol leucine $\text{L}^{-1}$ per $\mu\text{g P L}^{-1}$ ) |
